# Supplementary material
Source: PubMed Central journal article supplement (PMC5035838)
Supplement: Supp_Fig5.pdf [file Supp_Fig5.pdf]

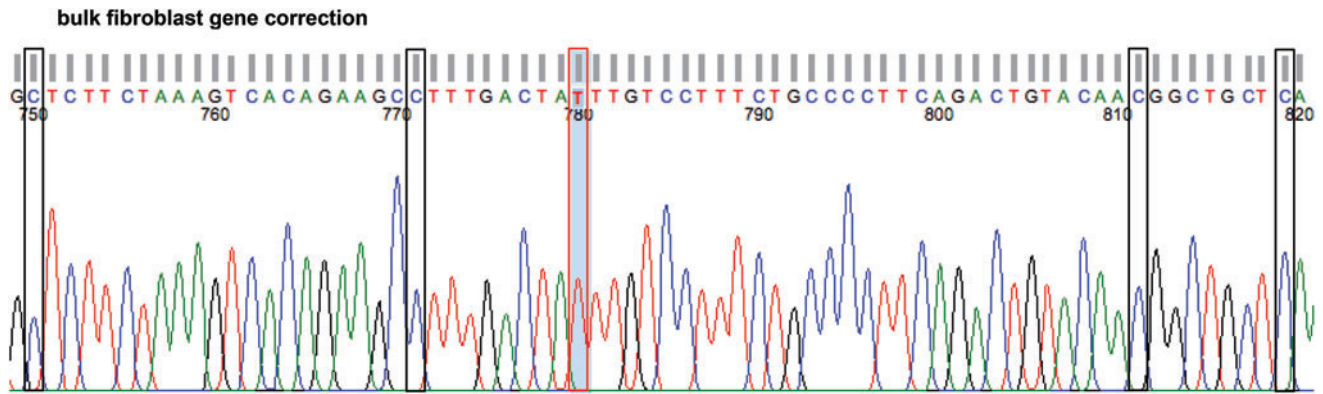

**SUPPLEMENTARY FIG. S5.** CRISPR/Cas9 mediated homologous recombination. FANCI primary fibroblast cell gene targeting. Cells were targeted with a plasmid HDR template and a bulk population of drug-resistant cells were obtained and HDR was detectable only at the cDNA level. The *shaded letters* indicate the targeted base for reversion/correction. *Boxed* bases show donor-derived silent polymorphisms. CRISPR, clustered, regularly interspaced short palindromic repeats.
