# Supplementary material
Source: PubMed Central journal article supplement (PMC5035838)
Supplement: Supp_Fig6.pdf [file Supp_Fig6.pdf]

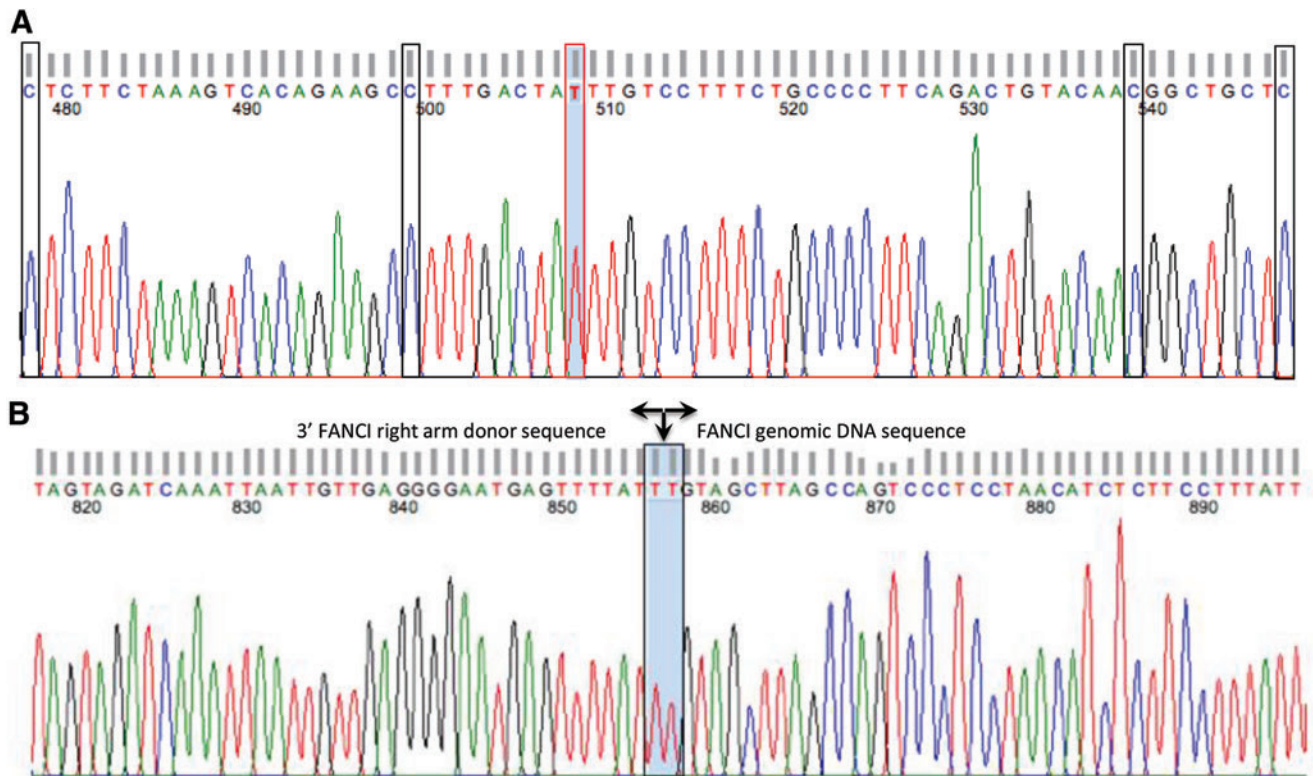

**SUPPLEMENTARY FIG. S6.** FANCI iPSC cell homologous recombination using a puromycin-based donor. PCR detection and Sanger sequence analysis of gene modification. **(A)** iPSC gene correction showing restoration of proper sequence (*shaded base*) and donor-derived polymorphisms (*boxed sequences*). **(B)** Donor and adjacent genomic locus junction is marked by the *shaded sequence* from an “inside-out” PCR with primers within the puromycin gene and the FANCI locus.
