# Supplementary material
Source: PubMed Central journal article supplement (PMC5035838)
Supplement: Supp_Fig7.pdf [file Supp_Fig7.pdf]

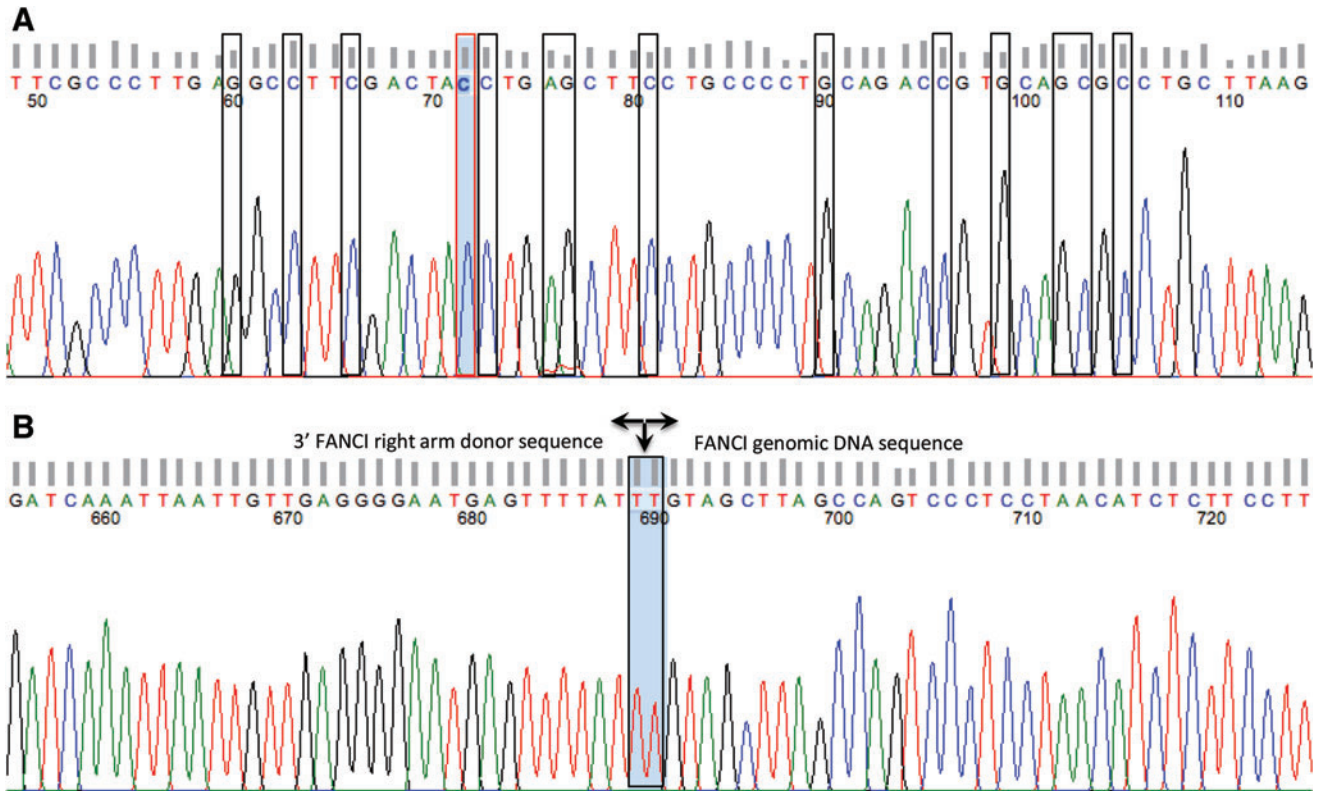

**SUPPLEMENTARY FIG. S7.** Exogenous marker sequence free donor mediated HDR in FANCI iPSC. HDR in FANCI iPSC with selection by mitomycin C. *Shaded letters* show the corrected DNA base. **(A)** Sequences marked by boxes are unique polymorphic bases introduced into the respective donor sequence. Note: in this donor format the 1461 T>A mutation is restored to the proper tyrosine AA sequence by incorporation of a cytosine rather than an thymidine as is shown in Supplementary Fig. 6. **(B)** The *shaded bases* indicate the junction between exogenous donor and endogenous sequence.
