# Supplementary material
Source: PubMed Central journal article supplement (PMC5035838)
Supplement: Supp_Fig8.pdf [file Supp_Fig8.pdf]

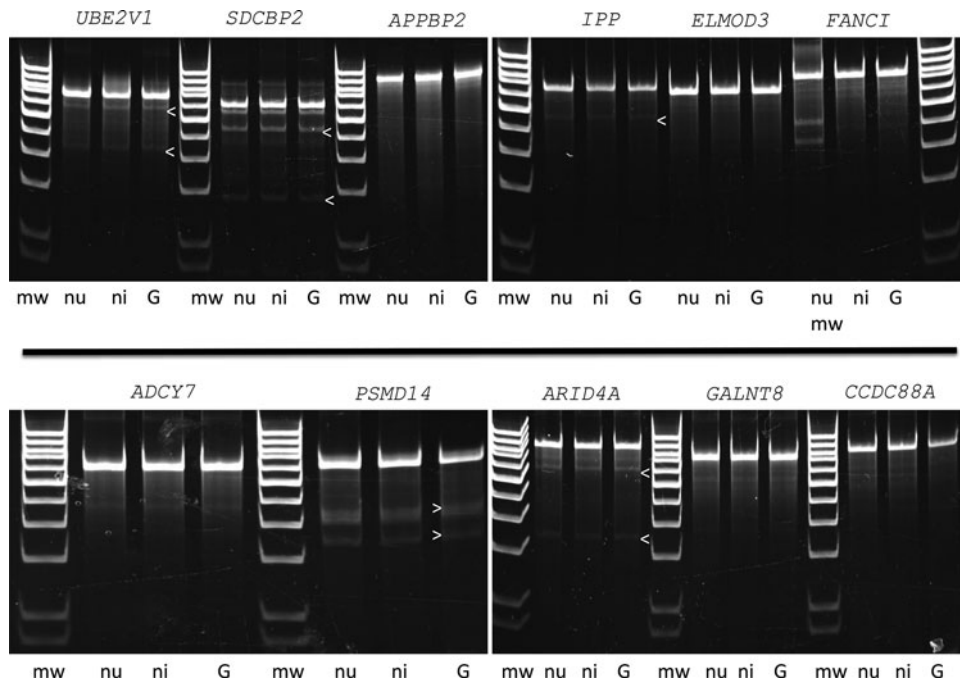

**SUPPLEMENTARY FIG. S8.** Off-target surveyor analysis. Shown are the gel images for the results presented in Table 1 with candidate off-target genes listed at *top*. Surveyor was performed on 293T cells that received the FANCI gRNA with the Cas9 nuclease (“nu”), Cas9 nickase (“ni”), or GFP (“G”). *White arrows* show bands in GFP controls consistent with polymorphisms resulting in Cas9 independent cleavage. Mw, molecular weight standards.
