# Supplementary material
Source: PubMed Central journal article supplement (PMC5035838)
Supplement: Supp_Fig9.pdf [file Supp_Fig9.pdf]

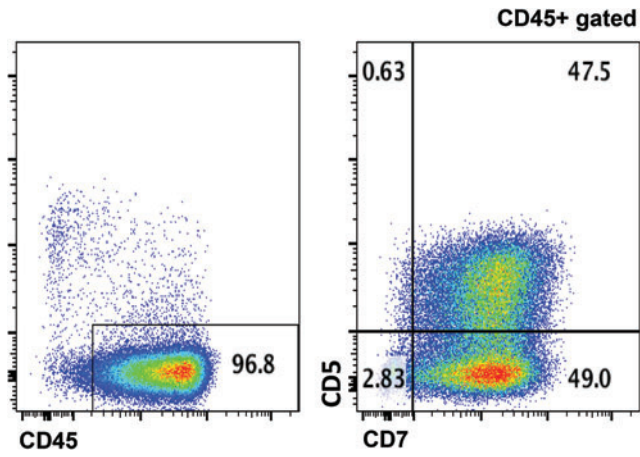

**SUPPLEMENTARY FIG. S9.** T-progenitor formation. Parental line iPSC, EB-derived, CD34 cells were plated on OP9 DL4 stromal cells and analyzed by flow cytometry for the CD5 and CD7 pan-T cell markers. EB, embryoid body.
