# Supplementary material
Source: PubMed Central journal article supplement (PMC5035838)
Supplement: Supp_Figs1-3.pdf [file Supp_Figs1-3.pdf]

## Supplementary Data

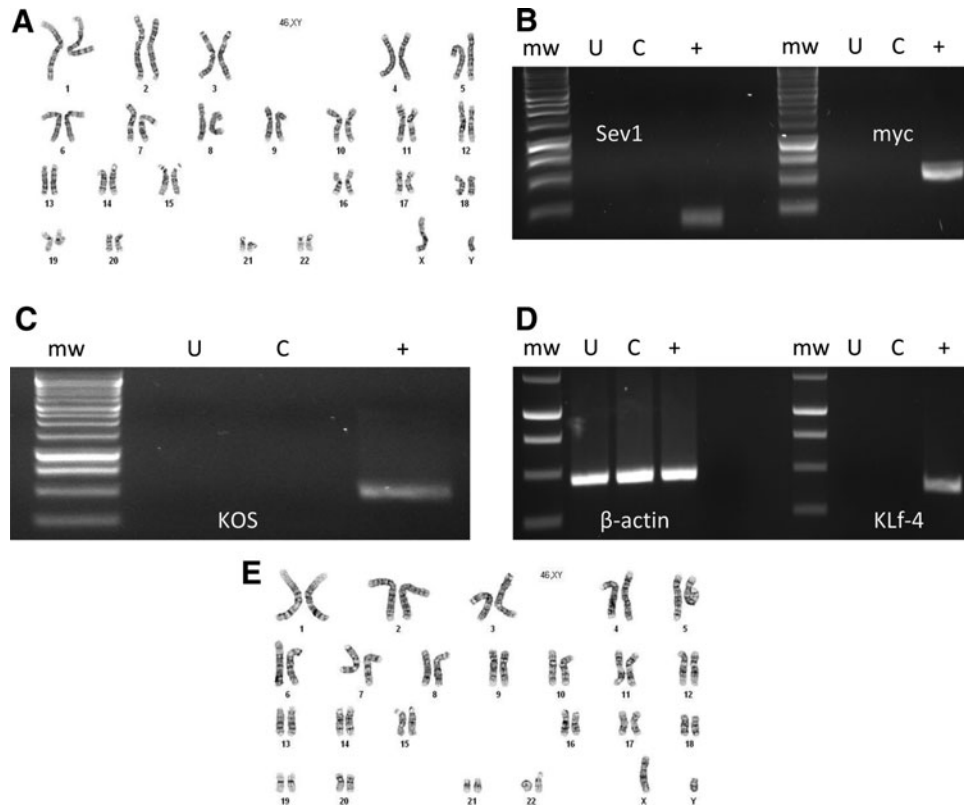

**SUPPLEMENTARY FIG. S1.** Cellular karyotype and Sendai virus clearance. **(A)** Pre reprogramming karyotype. Patient-derived fibroblasts utilized for iPSC generation showed a normal 46, XY karyotype. **(B–D)** Sendai virus genome/reprogramming factor associated clearance. Uncorrected iPSC (labeled “U”) or clone 8, gene-corrected iPSC (labeled “C”) were assessed for the presence of Sendai viral genome sequences **(B, Sev1)**, c-myc, **(C)** Oct3/4, Sox2, Klf4 particles, and **(D)** b-actin and Klf4. Positive controls (labeled “+”) are from early passage cells post Sendai virus delivery. **(E)** Post reprogramming Giemsa banding showing 46 XY karyotype. iPSC, induced pluripotent stem cell.

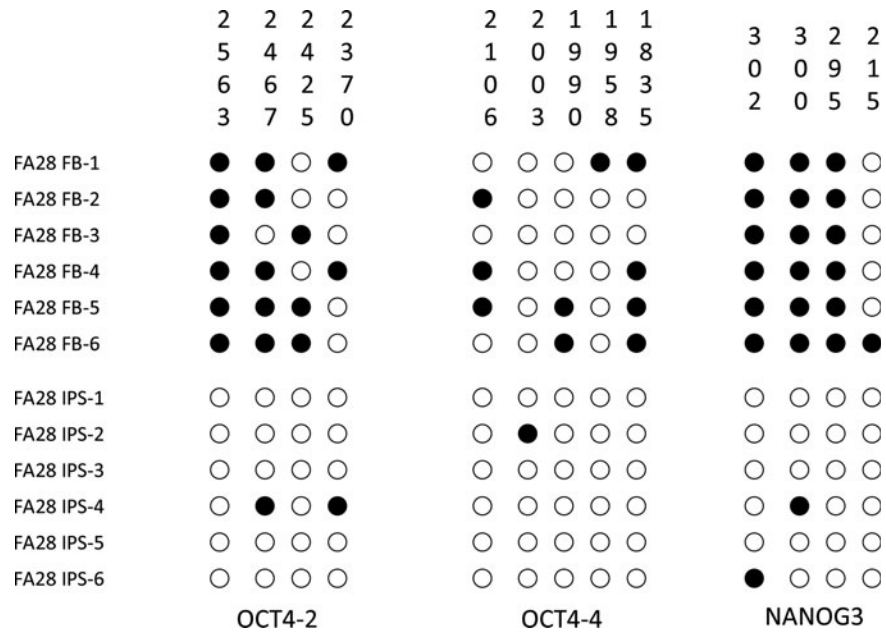

**SUPPLEMENTARY FIG. S2.** FANCI iPSC epigenetic promoter methylation analysis. Sodium bisulfite treated DNA from FANCI patient iPSC was amplified from the *OCT4* and *NANOG* gene promoter CpG islands and sequenced. *Open circles* show unmethylated DNA and *closed circle* indicates methylation. *N=6* samples for fibroblasts (FB) and iPSC were analyzed. *Numerical* indicators at *top* represent the CpG sequences in relation to the transcriptional start site.

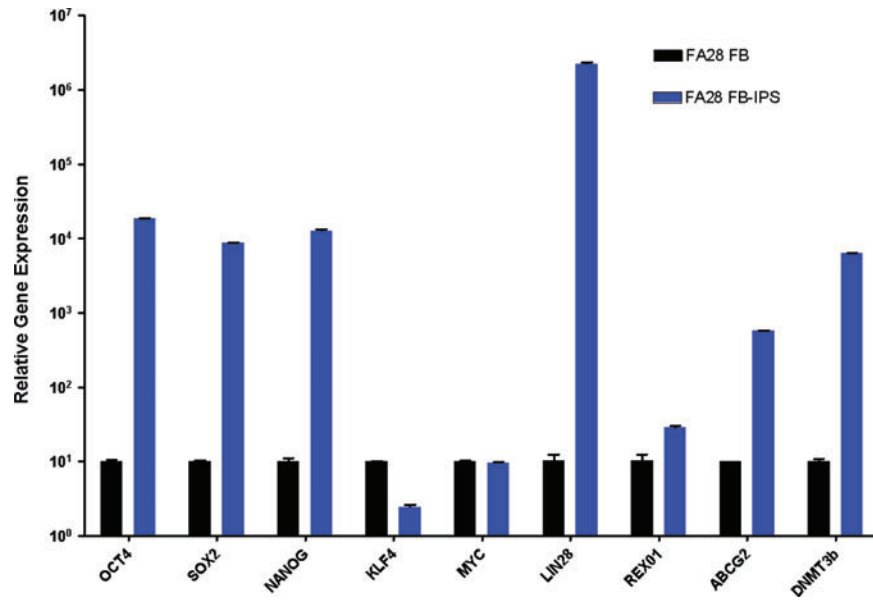

**SUPPLEMENTARY FIG. S3.** FANCI iPSC gene expression analysis. TaqMan qRT PCR gene expression analysis ( $n = 3$  replicates) of reprogramming associated genes in parental fibroblasts (*black bars*) and reprogrammed iPSC (*blue bars*). PCR, polymerase chain reaction.
