# Supplementary material
Source: PubMed Central journal article supplement (PMC5035838)
Supplement: Supp_Figs5-7.pdf [file Supp_Figs5-7.pdf]

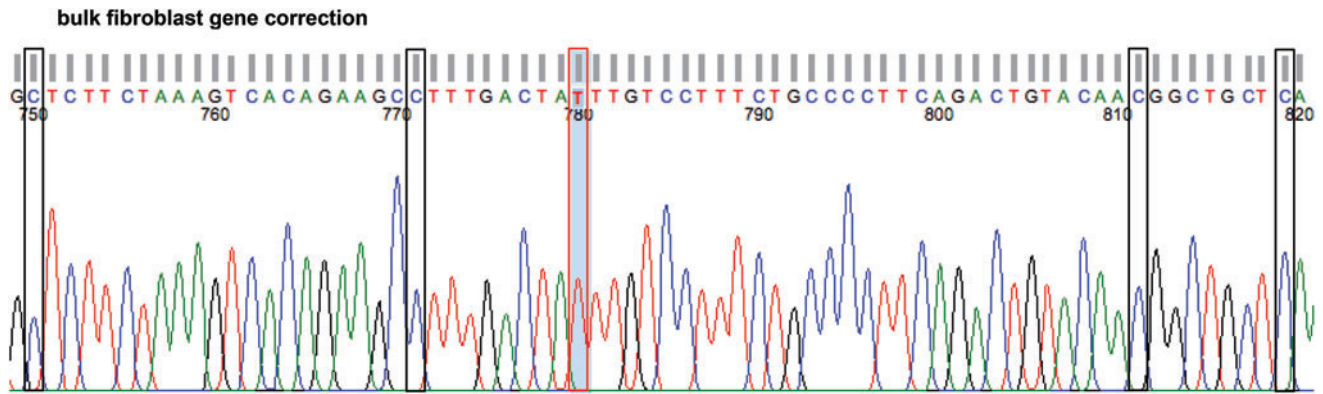

**SUPPLEMENTARY FIG. S5.** CRISPR/Cas9 mediated homologous recombination. FANCI primary fibroblast cell gene targeting. Cells were targeted with a plasmid HDR template and a bulk population of drug-resistant cells were obtained and HDR was detectable only at the cDNA level. The *shaded letters* indicate the targeted base for reversion/correction. *Boxed* bases show donor-derived silent polymorphisms. CRISPR, clustered, regularly interspaced short palindromic repeats.

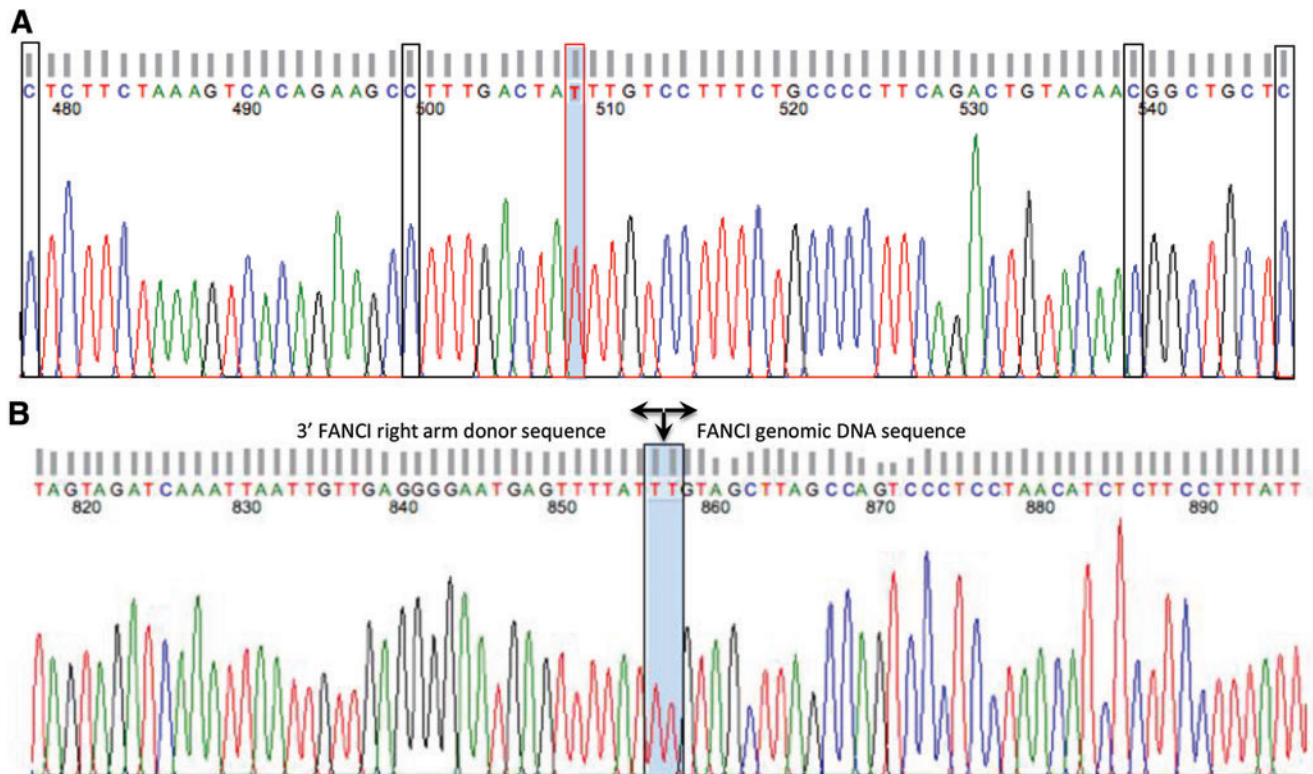

**SUPPLEMENTARY FIG. S6.** FANCI iPSC cell homologous recombination using a puromycin-based donor. PCR detection and Sanger sequence analysis of gene modification. **(A)** iPSC gene correction showing restoration of proper sequence (*shaded base*) and donor-derived polymorphisms (*boxed sequences*). **(B)** Donor and adjacent genomic locus junction is marked by the *shaded sequence* from an “inside-out” PCR with primers within the puromycin gene and the FANCI locus.

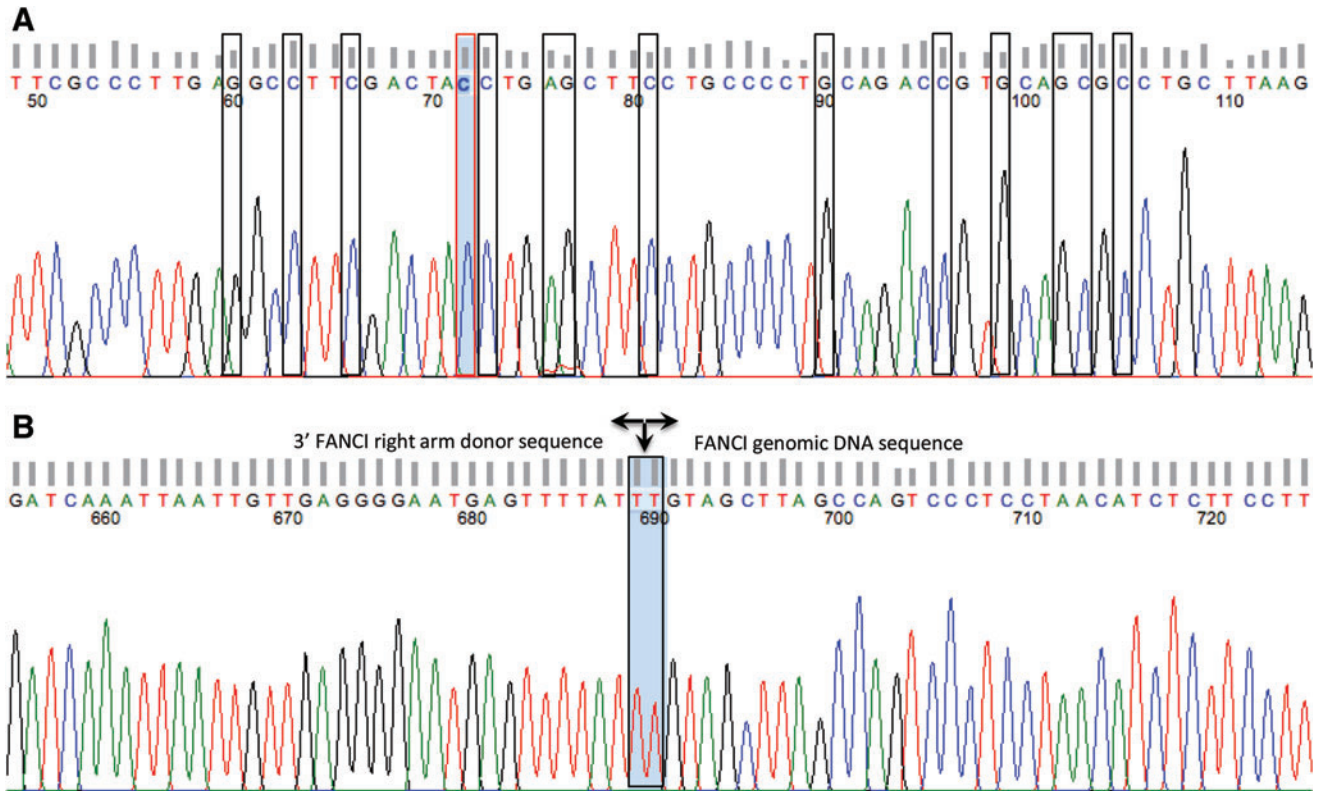

**SUPPLEMENTARY FIG. S7.** Exogenous marker sequence free donor mediated HDR in FANCI iPSC. HDR in FANCI iPSC with selection by mitomycin C. *Shaded letters* show the corrected DNA base. **(A)** Sequences marked by boxes are unique polymorphic bases introduced into the respective donor sequence. Note: in this donor format the 1461 T>A mutation is restored to the proper tyrosine AA sequence by incorporation of a cytosine rather than an thymidine as is shown in Supplementary Fig. 6. **(B)** The *shaded bases* indicate the junction between exogenous donor and endogenous sequence.
